# Supplementary material for: The Healthy Fatty Index Allows for Deeper Insights into the Lipid Composition of Foods of Animal Origin When Compared with the Atherogenic and Thrombogenicity Indexes
Source: MDPI journal article supplement (doi:10.3390/foods13101568), 2024-05-17
Supplement: s1 [file s1]

## Supplementary tables

**Table S1.** Classification of foods according to the HFI value categorized by the binning technique

| <b>HFI (Binned)</b>                    |                                             |                                     |
|----------------------------------------|---------------------------------------------|-------------------------------------|
| <b>Low HFI</b><br><b>(&lt;= 2.575)</b> | <b>Medium HFI</b><br><b>(2.576 - 3.685)</b> | <b>High HFI</b><br><b>(3.6854+)</b> |
| Aged cheese                            | Beef Fillet                                 | Anchovy                             |
| Butter                                 | Beef Sirloin steak                          | Chicken Breast standard             |
| Chicken egg                            | Beef Thick flank                            | Clams                               |
| Cooked ham                             | Blue cheese                                 | Cod Fresh                           |
| Cow ricotta                            | Bresaola                                    | Cod Frozen                          |
| Crude Italian ham                      | Chicken Breast FG                           | Farmed Eel                          |
| Lamb Cutlet                            | Chicken Breast SG                           | Frozen shelled prawns               |
| Lamb Thigh                             | Chicken Whole with skin                     | Horse Low-fat meat                  |
| Mixed caciotta                         | Duck egg                                    | Lobster                             |
| Pork Steak                             | Horse Fat and meat                          | Mussel                              |
| Pure pork Wurstel                      | Mortadella                                  | Octopus                             |
| Salami                                 | Pork lard                                   | Salmon fresch                       |
| Semi-skimmed milk                      | Pork Loin                                   | Salmon smoked                       |
| Sheep ricotta                          | Pork Shoulder                               | Sea bas fillet Caught               |
| Speck                                  | Rabbit loin                                 | Sea bas fillet Farmed               |
| Suet                                   | Turkey breast                               | Seabream bass Caught                |
| whole milk                             | Yolk Bio-plus                               | Seabream bass Farmed                |
| Yogurt from whole milk                 |                                             | Sole                                |
| Yolk conventional                      |                                             | Tuna                                |

**Table S2.** Classification of foods according to the AI value categorized by the binning technique

| <b>AI (Binned)</b>         |                                      |                              |
|----------------------------|--------------------------------------|------------------------------|
| <b>Low AI<br/>(≤ 0.49)</b> | <b>Medium AI<br/>(0.491 - 0.679)</b> | <b>High AI<br/>(0.6789+)</b> |
| Bresaola                   | Beef Fillet                          | Aged cheese                  |
| Chicken Breast standard    | Beef Sirloin steak                   | Anchovy                      |
| Chicken Whole with skin    | Beef Thick flank                     | Blue cheese                  |
| Cod fresh                  | Chicken breast fg                    | Butter                       |
| Cod frozen                 | Chicken breast sg                    | Cooked ham                   |
| Duck egg                   | Chicken egg                          | Cow ricotta                  |
| Horse Low-fat meat         | Clams                                | Crude Italian ham            |
| Lobster                    | Farmed Eel                           | Lamb Cutlet                  |
| Mussel                     | Frozen shelled prawns                | Mixed caciotta               |
| Pork lard                  | Horse Fat and meat                   | Mortadella                   |
| Pork loin                  | Lamb thigh                           | Octopus                      |
| Pure pork Wurstel          | Pork Shoulder                        | Pork Steak                   |
| Salami                     | Rabbit loin                          | Semi-skimmed milk            |
| Sea bas fillet Farmed      | Salmon fresch                        | Sheep ricotta                |
| Seabream bass Caught       | Salmon smoked                        | Speck                        |
| Seabream bass Farmed       | Sea bas fillet Caught                | Tuna                         |
| Sole                       | Suet                                 | Whole milk                   |
| Yolk Bio-plus              | Turkey breast                        | Yogurt from whole milk       |
| Yolk conventional          |                                      |                              |

**Table S3.** Classification of foods according to the TI value categorized by the binning technique.

| <b>TI (Binned)</b>                          |                                      |                             |
|---------------------------------------------|--------------------------------------|-----------------------------|
| <b>Low TI<br/>(<math>\leq 0.670</math>)</b> | <b>Medium TI<br/>(0.671 - 1.211)</b> | <b>High TI<br/>(1.211+)</b> |
| Anchovy                                     | Beef Fillet                          | Aged cheese                 |
| Blue cheese                                 | Beef Sirloin steak                   | Butter                      |
| Clams                                       | Beef Thick flank                     | Chicken Breast FG           |
| Cod fresh                                   | Bresaola                             | Chicken egg                 |
| Cod frozen                                  | Chicken breast sg                    | Cooked ham                  |
| Farmed eel                                  | Chicken breast standard              | Cow ricotta                 |
| Frozen shelled prawns                       | Chicken Whole with skin              | Crude Italian ham           |
| Lobster                                     | Duck egg                             | Lamb Cutlet                 |
| Mussel                                      | Horse Fat and meat                   | Lamb Thigh                  |
| Octopus                                     | Horse Low-fat meat                   | Mixed caciotta              |
| Salmon fresch                               | Mortadella                           | Pork Shoulder               |
| Salmon smoked                               | Pork lard                            | Pork Steak                  |
| Sea bas fillet Caught                       | Pork Loin                            | Semi-skimmed milk           |
| Sea bas fillet Farmed                       | Pure pork Wurstel                    | Sheep ricotta               |
| Seabream bass Caught                        | Rabbit loin                          | Suet                        |
| Seabream bass Farmed                        | Salami                               | Whole milk                  |
| Sole                                        | Speck                                | Yogurt from whole milk      |
| Tuna                                        | Turkey breast                        | Yolk conventional           |
| Yolk Bio-plus                               |                                      |                             |

**Table S4.** Crosstabulation of HFI and AI categories.

| AI* (Binned)                | HFI (Binned)   |                |                | Total          |
|-----------------------------|----------------|----------------|----------------|----------------|
|                             | Low HFI        | Medium HFI     | High HFI       |                |
| <b>Low AI (opposite)</b>    | 13<br>(68.4%)  | 2<br>(11.8%)   | 3<br>(15.8%)   | 18<br>(33.3%)  |
| <b>Medium AI (opposite)</b> | 3<br>(15.8%)   | 9<br>(52.9%)   | 6<br>(31.6%)   | 18<br>(33.3%)  |
| <b>High AI (opposite)</b>   | 3<br>(15.8%)   | 6<br>(35.3%)   | 10<br>(52.6%)  | 19<br>(33.3%)  |
| <b>Total</b>                | 19<br>(100.0%) | 17<br>(100.0%) | 19<br>(100.0%) | 54<br>(100.0%) |

\* the opposite of AI was calculated to make the categories comparable

P value for McNemar-test=0.978

**Table S5.** Crosstabulation of HFI and TI categories.

| TI* (Binned)                | HFI (Binned)   |                |                | Total          |
|-----------------------------|----------------|----------------|----------------|----------------|
|                             | Low HFI        | Medium HFI     | High HFI       |                |
| <b>Low TI (opposite)</b>    | 16<br>(84.2%)  | 2<br>(11.8%)   | 0<br>(0.0%)    | 18<br>(33.3%)  |
| <b>Medium TI (opposite)</b> | 3<br>(15.8%)   | 13<br>(76.5%)  | 2<br>(10.5%)   | 18<br>(33.3%)  |
| <b>High TI (opposite)</b>   | 0<br>(0.0%)    | 2<br>(11.8%)   | 17<br>(89.5%)  | 19<br>(33.3%)  |
| <b>Total</b>                | 19<br>(100.0%) | 17<br>(100.0%) | 19<br>(100.0%) | 54<br>(100.0%) |

\* the opposite of AI was calculated to make the categories comparable

P value for McNemar-test=0.905

**Table S6.** Crosstabulation of AI and TI categories.

| TI (Binned)      | AI (Binned)    |                |                | Total          |
|------------------|----------------|----------------|----------------|----------------|
|                  | Low AI         | Medium AI      | High AI        |                |
| <b>Low TI</b>    | 9<br>(47.4%)   | 6<br>(33.3%)   | 4<br>(22.2%)   | 19<br>(33.3%)  |
| <b>Medium TI</b> | 9<br>(47.4%)   | 7<br>(38.9%)   | 2<br>(11.1%)   | 18<br>(33.3%)  |
| <b>High TI</b>   | 1<br>(5.3%)    | 5<br>(27.8%)   | 12<br>(66.7%)  | 18<br>(33.3%)  |
| <b>Total</b>     | 19<br>(100.0%) | 18<br>(100.0%) | 18<br>(100.0%) | 54<br>(100.0%) |

P value for McNemar-test=0.297

**Table S7.** Results of the Automatic Linear Modeling procedures including the indices (HFI: a), IA: b), IT: c)) as target and the percentage of SFA and n-3 as predictors.

a) Coefficients target: HFI

| Model term      | Coefficient | Standard error | t      | Sig.   | 95% Confidence interval |        | Importance |
|-----------------|-------------|----------------|--------|--------|-------------------------|--------|------------|
|                 |             |                |        |        | Lower                   | Upper  |            |
| Intercept       | 4.475       | 0.544          | 8.222  | <0.001 | 3.3383                  | 5.567  |            |
| n-3 transformed | 0.146       | 0.011          | 13.010 | <0.001 | 0.124                   | 0.169  | 0.872      |
| SFA transformed | -0.056      | 0.011          | -4.978 | <0.001 | -0.078                  | -0.033 | 0.128      |

b) Coefficients target: IA

| Model term      | Coefficient | Standard error | t       | Sig.   | 95% Confidence interval |        | Importance |
|-----------------|-------------|----------------|---------|--------|-------------------------|--------|------------|
|                 |             |                |         |        | Lower                   | Upper  |            |
| Intercept       | -1.645      | 0.163          | -10.078 | <0.001 | -1.973                  | -1.318 |            |
| n-3 transformed | 0.058       | 0.003          | 17.157  | <0.001 | 0.051                   | 0.064  | 0.948      |
| SFA transformed | 0.014       | 0.003          | 4.028   | <0.001 | 0.007                   | 0.020  | 0.052      |

c) Coefficients target: IT

| Model term      | Coefficient | Standard error | t      | Sig.   | 95% Confidence interval |        | Importance |
|-----------------|-------------|----------------|--------|--------|-------------------------|--------|------------|
|                 |             |                |        |        | Lower                   | Upper  |            |
| Intercept       | -0.370      | 0.204          | -1.810 | 0.076  | -0.779                  | 0.040  |            |
| n-3 transformed | 0.039       | 0.004          | 9.194  | <0.001 | 0.030                   | 0.047  | 0.842      |
| SFA transformed | -0.017      | 0.004          | -3.984 | <0.001 | -0.025                  | -0.008 | 0.158      |

t: t-statistic value; Sig.: Significance

**Table S8.** Fatty acids profile (% of total FA) of meat sub-category.

|            | % of total FA |             |               |       |          |       |       |        |              |              |                 |                 |           |           |               |             |
|------------|---------------|-------------|---------------|-------|----------|-------|-------|--------|--------------|--------------|-----------------|-----------------|-----------|-----------|---------------|-------------|
|            | Beef          |             |               | Pork  |          |       | Lamb  |        | Horse        |              | Chicken         |                 |           |           | Turkey breast | Rabbit loin |
|            | Fillet        | Thick flank | Sirloin steak | Loin  | Shoulder | Steak | Thigh | Cutlet | Low-fat meat | Fat and meat | Whole with skin | Breast standard | Breast SG | Breast FG |               |             |
| C12:0      | 0.00          | 0.00        | 0.00          | 0.16  | 0.17     | 3.03  | 0.45  | 0.42   | 0.00         | 0.16         | 0.00            | 0.00            | 0.20      | 0.62      | 0.00          | 0.00        |
| C14:0      | 2.56          | 2.53        | 2.46          | 1.10  | 2.27     | 4.21  | 3.64  | 3.79   | 1.27         | 3.88         | 1.33            | 1.49            | 0.71      | 1.04      | 2.94          | 2.40        |
| C16:0      | 20.23         | 20.22       | 20.13         | 22.14 | 28.43    | 25.00 | 24.55 | 24.41  | 21.52        | 26.66        | 25.43           | 19.83           | 27.98     | 30.01     | 20.59         | 29.70       |
| C18:0      | 13.95         | 14.16       | 14.09         | 11.46 | 8.21     | 14.87 | 14.09 | 14.31  | 11.39        | 3.72         | 9.62            | 14.88           | 12.02     | 11.00     | 12.75         | 7.00        |
| Others     | 2.10          | 2.02        | 2.01          | 0.15  | 0.62     | 1.05  | 3.18  | 2.95   | 0.00         | 0.49         | 0.07            | 0.00            | 2.49      | 2.07      | 0.97          | 2.60        |
| Total SFA  | 38.84         | 38.93       | 38.69         | 35.01 | 39.70    | 48.16 | 45.91 | 45.88  | 34.18        | 34.91        | 36.45           | 36.20           | 43.40     | 44.74     | 37.25         | 41.70       |
| C14:1n-6   | 1.86          | 2.02        | 1.79          | 0.00  | 0.00     | 0.16  | 0.00  | 0.00   | 0.00         | 0.00         | 0.00            | 1.49            | 0.15      | 0.11      | 0.98          | 0.15        |
| C16:1n-7   | 3.02          | 3.03        | 2.91          | 1.57  | 2.27     | 0.58  | 1.82  | 1.68   | 1.27         | 10.34        | 5.93            | 1.50            | 0.61      | 1.39      | 2.94          | 1.40        |
| C18:1n-9   | 29.30         | 29.32       | 29.29         | 32.97 | 32.44    | 18.46 | 36.82 | 36.62  | 13.92        | 34.26        | 34.38           | 23.80           | 19.50     | 23.04     | 24.51         | 24.40       |
| Others     | 3.73          | 3.55        | 3.80          | 2.82  | 2.27     | 0.28  | 0.45  | 1.26   | 0.00         | 2.10         | 1.85            | 1.48            | 0.26      | 0.17      | 1.96          | 0.28        |
| Total MUFA | 37.91         | 37.92       | 37.79         | 37.36 | 36.98    | 32.76 | 39.09 | 39.56  | 15.19        | 46.70        | 42.16           | 28.27           | 20.52     | 23.94     | 30.39         | 26.00       |
| C18:2n-6   | 10.93         | 11.12       | 10.96         | 26.37 | 23.55    | 19.08 | 10.93 | 9.68   | 31.65        | 12.12        | 16.68           | 20.50           | 19.09     | 20.70     | 18.63         | 24.10       |
| C20:2n-6   | 0.00          | 0.00        | 0.00          | 0.00  | 0.00     | 0.00  | 0.00  | 0.00   | 0.00         | 0.00         | 0.00            | 0.00            | 0.68      | 0.20      | 0.00          | 0.29        |
| C20:3n-6   | 0.00          | 0.00        | 0.00          | 0.00  | 0.00     | 0.00  | 0.00  | 0.00   | 0.00         | 0.00         | 0.00            | 0.00            | 0.17      | 0.16      | 0.00          | 0.00        |
| C20:4n-6   | 3.26          | 3.03        | 3.13          | 0.47  | 0.52     | 0.00  | 4.09  | 3.37   | 7.59         | 1.13         | 2.56            | 8.40            | 10.60     | 8.03      | 6.86          | 0.43        |

|            |       |       |       |       |       |        |       |       |       |       |       |       |       |       |       |       |
|------------|-------|-------|-------|-------|-------|--------|-------|-------|-------|-------|-------|-------|-------|-------|-------|-------|
| Total n-6  | 14.19 | 14.15 | 14.09 | 26.84 | 24.07 | 19.08  | 15.02 | 13.05 | 39.24 | 13.25 | 19.24 | 28.90 | 29.54 | 29.09 | 25.49 | 24.82 |
| C18:3n-3   | 2.09  | 2.02  | 2.24  | 0.32  | 0.29  | 0.13   | 0.45  | 0.42  | 2.24  | 5.01  | 1.23  | 5.20  | 2.03  | 0.98  | 0.98  | 1.00  |
| C20:3n-3   | 0.00  | 0.00  | 0.00  | 0.00  | 0.03  | 0.00   | 0.00  | 0.00  | 0.00  | 0.00  | 0.00  | 0.00  | 0.04  | 0.03  | 0.00  | 0.00  |
| C20:5n-3   | 2.56  | 2.53  | 2.68  | 0.00  | 0.00  | 0.00   | 0.00  | 0.00  | 1.27  | 0.00  | 0.20  | 0.50  | 0.68  | 0.09  | 0.00  | 5.40  |
| C21:5n-3   | 0.00  | 0.00  | 0.00  | 0.00  | 0.00  | 0.00   | 0.00  | 0.00  | 0.00  | 0.00  | 0.00  | 0.00  | 0.87  | 0.03  | 0.00  | 0.00  |
| C22:5n-3   | 0.00  | 0.00  | 0.00  | 0.00  | 0.00  | 0.00   | 0.00  | 0.00  | 0.00  | 0.00  | 0.00  | 0.00  | 1.37  | 0.92  | 0.00  | 0.00  |
| C22:6n-3   | 1.06  | 1.52  | 1.34  | 0.00  | 0.00  | 0.00   | 0.00  | 0.00  | 0.00  | 0.00  | 0.72  | 0.50  | 1.05  | 0.18  | 2.94  | 0.10  |
| Total n-3  | 5.71  | 6.07  | 6.26  | 0.32  | 0.32  | 0.13   | 0.45  | 0.42  | 3.51  | 5.01  | 2.15  | 6.20  | 4.54  | 2.23  | 3.92  | 6.50  |
| n-6/n-3    | 2.49  | 2.33  | 2.25  | 83.88 | 75.22 | 146.77 | 33.38 | 31.07 | 11.18 | 2.64  | 8.95  | 4.66  | 6.50  | 13.04 | 6.50  | 3.82  |
| Others     | 3.12  | 3.04  | 2.68  | 1.41  | 0.00  | 0.53   | 0.44  | 0.42  | 7.88  | 0.49  | 0.00  | 35.10 | 0.50  | 0.00  | 3.92  | 0.58  |
| Total PUFA | 23.02 | 23.26 | 23.03 | 28.57 | 24.07 | 19.74  | 15.91 | 13.89 | 50.63 | 18.75 | 21.39 | 25.41 | 35.58 | 31.32 | 33.33 | 31.90 |

FA: fatty acids; SFA: saturated fatty acids; MUFA: monounsaturated fatty acids; PUFA: polyunsaturated fatty acids; SG: slow-growing; FG: fast-growing

**Table S9** Fatty acids profile (mg/100g) of meat sub-category.

| mg/100g    |         |             |               |         |          |         |        |         |              |              |                 |                 |           |           |               |             |
|------------|---------|-------------|---------------|---------|----------|---------|--------|---------|--------------|--------------|-----------------|-----------------|-----------|-----------|---------------|-------------|
|            | Beef    |             |               | Pork    |          |         | Lamb   |         | Horse        |              | Chicken         |                 |           |           | Turkey breast | Rabbit loin |
|            | Fillet  | Thick flank | Sirloin steak | Loin    | Shoulder | Steak   | Thigh  | Cutlet  | Low-fat meat | Fat and meat | Whole with skin | Breast standard | Breast SG | Breast FG |               |             |
| C12:0      | 0.00    | 0.00        | 0.00          | 9.69    | 9.27     | 209.77  | 9.74   | 9.81    | 0.00         | 9.42         | 0.00            | 0.00            | 0.43      | 7.41      | 0.00          | 0.00        |
| C14:0      | 110.77  | 50.36       | 110.70        | 66.63   | 123.76   | 291.46  | 78.75  | 88.55   | 10.99        | 235.04       | 122.00          | 10.32           | 1.54      | 12.42     | 30.53         | 27.00       |
| C16:0      | 875.33  | 402.45      | 905.84        | 1341.16 | 1549.96  | 1730.75 | 531.12 | 570.34  | 186.23       | 1614.96      | 2332.69         | 137.28          | 60.53     | 358.45    | 213.82        | 334.12      |
| C18:0      | 603.60  | 281.84      | 634.04        | 694.20  | 447.60   | 1029.45 | 304.83 | 334.35  | 98.57        | 225.34       | 882.44          | 103.01          | 30.33     | 131.39    | 132.40        | 78.75       |
| Others     | 90.86   | 40.21       | 90.45         | 9.09    | 33.80    | 72.69   | 68.80  | 68.93   | 0.00         | 29.68        | 6.42            | 0.00            | 7.55      | 24.72     | 10.07         | 29.25       |
| Total SFA  | 1680.56 | 774.85      | 1741.03       | 2120.77 | 2164.39  | 3334.12 | 993.23 | 1071.99 | 295.79       | 2114.72      | 3343.55         | 250.61          | 100.38    | 534.39    | 386.82        | 469.12      |
| C14:1n-6   | 80.48   | 40.21       | 80.55         | 0.00    | 0.00     | 11.08   | 0.00   | 0.00    | 0.00         | 0.00         | 0.00            | 10.32           | 0.32      | 1.31      | 10.18         | 1.69        |
| C16:1n-7   | 130.67  | 60.31       | 130.95        | 95.10   | 123.76   | 40.15   | 39.37  | 39.25   | 10.99        | 626.36       | 543.96          | 10.38           | 1.32      | 16.60     | 30.53         | 15.75       |
| C18:1n-9   | 1267.77 | 583.57      | 1318.04       | 1997.20 | 1768.58  | 1277.99 | 796.58 | 855.63  | 120.46       | 2075.34      | 3153.67         | 164.77          | 40.02     | 275.20    | 254.52        | 274.50      |
| Others     | 161.39  | 70.66       | 171.00        | 170.83  | 123.76   | 19.38   | 9.74   | 29.44   | 0.00         | 127.21       | 169.70          | 10.25           | 0.56      | 2.03      | 20.35         | 3.15        |
| Total MUFA | 1640.32 | 754.75      | 1700.53       | 2263.13 | 2016.10  | 2267.97 | 845.69 | 924.32  | 131.45       | 2828.91      | 3867.33         | 195.71          | 42.23     | 293.95    | 315.58        | 292.50      |
| C18:2n-6   | 472.93  | 221.33      | 493.19        | 1597.40 | 1283.91  | 1320.91 | 236.46 | 226.17  | 273.89       | 734.18       | 1530.05         | 141.92          | 39.14     | 247.25    | 193.46        | 271.12      |
| C20:2n-6   | 0.00    | 0.00        | 0.00          | 0.00    | 0.00     | 0.00    | 0.00   | 0.00    | 0.00         | 0.00         | 0.00            | 0.00            | 1.47      | 2.39      | 0.00          | 3.26        |
| C20:3n-6   | 0.00    | 0.00        | 0.00          | 0.00    | 0.35     | 0.00    | 0.00   | 0.00    | 0.00         | 0.00         | 0.00            | 0.00            | 0.37      | 1.91      | 0.00          | 0.00        |



|            |         |         |         |         |         |         |         |         |        |         |         |        |        |         |         |         |
|------------|---------|---------|---------|---------|---------|---------|---------|---------|--------|---------|---------|--------|--------|---------|---------|---------|
| C20:4n-6   | 141.06  | 60.31   | 140.85  | 28.47   | 28.35   | 0.00    | 88.48   | 78.74   | 65.68  | 68.45   | 234.83  | 58.15  | 22.93  | 95.91   | 71.24   | 4.84    |
| Total n-6  | 613.98  | 281.64  | 634.04  | 1625.87 | 1312.26 | 1320.91 | 324.95  | 304.91  | 339.57 | 802.64  | 1764.88 | 200.07 | 63.91  | 347.46  | 264.70  | 279.22  |
| C18:3n-3   | 90.43   | 40.21   | 100.80  | 19.38   | 15.81   | 9.00    | 9.74    | 9.81    | 19.38  | 303.49  | 112.83  | 36.00  | 2.23   | 11.71   | 10.18   | 11.25   |
| C20:3n-3   | 0.00    | 0.00    | 0.00    | 0.00    | 1.64    | 0.00    | 0.00    | 0.00    | 0.00   | 0.00    | 0.00    | 0.00   | 0.09   | 0.36    | 0.00    | 0.00    |
| C20:5n-3   | 110.77  | 50.36   | 120.60  | 0.00    | 0.00    | 0.00    | 0.00    | 0.00    | 10.99  | 0.00    | 18.35   | 3.46   | 0.39   | 1.07    | 0.00    | 60.75   |
| C21:5n-3   | 0.00    | 0.00    | 0.00    | 0.00    | 0.00    | 0.00    | 0.00    | 0.00    | 0.00   | 0.00    | 0.00    | 0.00   | 1.88   | 0.36    | 0.00    | 0.00    |
| C22:5n-3   | 0.00    | 0.00    | 0.00    | 0.00    | 0.00    | 0.00    | 0.00    | 0.00    | 0.00   | 0.00    | 0.00    | 0.00   | 2.96   | 10.99   | 0.00    | 0.00    |
| C22:6n-3   | 45.86   | 30.25   | 60.30   | 0.00    | 0.00    | 0.00    | 0.00    | 0.00    | 0.00   | 0.00    | 66.05   | 3.46   | 2.26   | 2.15    | 30.53   | 1.12    |
| Total n-3  | 247.06  | 120.82  | 281.70  | 19.38   | 17.45   | 9.00    | 9.74    | 9.81    | 30.37  | 303.49  | 197.22  | 42.92  | 9.81   | 26.64   | 40.71   | 73.12   |
| n-6/n-3    | 2.49    | 2.33    | 2.25    | 83.88   | 75.22   | 146.77  | 33.38   | 31.07   | 11.18  | 2.64    | 8.95    | 4.66   | 6.51   | 13.04   | 6.50    | 3.82    |
| Total PUFA | 996.05  | 462.96  | 1036.34 | 1730.66 | 1312.26 | 1366.60 | 688.41  | 276.46  | 438.14 | 1135.80 | 1962.10 | 243.00 | 73.72  | 374.10  | 346.12  | 358.87  |
| Total      | 4316.93 | 1992.56 | 4477.9  | 6114.56 | 5492.75 | 6968.69 | 2527.33 | 2272.77 | 865.38 | 6079.43 | 9172.98 | 689.32 | 216.33 | 1202.44 | 1048.52 | 1120.49 |

FA: fatty acids; SFA: saturated fatty acids; MUFA: monounsaturated fatty acids; PUFA: polyunsaturated fatty acids; SG: slow-growing; FG: fast-growing



|            |       |       |       |       |       |       |       |       |       |
|------------|-------|-------|-------|-------|-------|-------|-------|-------|-------|
| C20:5n-3   | 0.00  | 0.00  | 0.32  | 0.00  | 0.31  | 0.00  | 0.00  | 0.00  | 0.00  |
| C21:5n-3   | 0.00  | 0.00  | 0.00  | 0.00  | 0.00  | 0.00  | 0.00  | 0.00  | 0.00  |
| C22:5n-3   | 0.00  | 0.00  | 0.00  | 0.00  | 0.00  | 0.00  | 0.00  | 0.00  | 0.00  |
| C22:6n-3   | 0.00  | 0.00  | 0.00  | 0.10  | 0.00  | 0.00  | 0.00  | 0.00  | 0.00  |
| Total n-3  | 0.60  | 0.60  | 1.42  | 2.40  | 1.11  | 2.97  | 0.60  | 0.70  | 0.95  |
| n-6/n-3    | 21.83 | 15.33 | 10.56 | 5.71  | 12.92 | 8.78  | 35.17 | 17.86 | 11.69 |
| Total PUFA | 13.70 | 9.80  | 16.10 | 26.00 | 15.45 | 29.06 | 12.70 | 13.20 | 12.06 |

FA: fatty acids; SFA: saturated fatty acids; MUFA: monounsaturated fatty acids; PUFA: polyunsaturated fatty acids.

**Table S11.** Fatty acids profile (mg/100g) of processed meat sub-category.

| mg/100g    |         |            |         |          |          |           |            |                   |          |
|------------|---------|------------|---------|----------|----------|-----------|------------|-------------------|----------|
|            | Raw ham | Cooked ham | Speck   | Bresaola | Salami   | Pork Lard | Mortadella | Pure pork Wurstel | Suet     |
| C12:0      | 16.10   | 20.60      | 49.59   | 0.00     | 24.66    | 59.97     | 21.63      | 18.26             | 205.61   |
| C14:0      | 1046.24 | 669.37     | 958.66  | 24.23    | 404.48   | 539.73    | 2271.61    | 255.63            | 1165.14  |
| C16:0      | 3396.25 | 2358.23    | 3355.32 | 309.80   | 5388.91  | 18231.03  | 4132.17    | 3980.55           | 21212.42 |
| C18:0      | 2398.30 | 1709.46    | 2314.01 | 221.54   | 2944.78  | 9595.28   | 2206.71    | 2099.83           | 14718.47 |
| Others     | 96.58   | 41.19      | 99.17   | 15.58    | 22.20    | 231.31    | 346.15     | 109.56            | 197.05   |
| Total SFA  | 6953.46 | 4798.85    | 6776.75 | 571.15   | 8785.03  | 28657.33  | 8978.27    | 6463.83           | 37498.69 |
| C14:1n-6   | 0.00    | 0.00       | 0.00    | 2.60     | 0.00     | 0.00      | 0.00       | 0.00              | 445.50   |
| C16:1n-7   | 418.50  | 267.75     | 446.27  | 39.81    | 517.93   | 1113.74   | 584.13     | 511.26            | 2253.18  |
| C18:1n-9   | 6486.68 | 4119.19    | 6429.65 | 482.88   | 11051.57 | 29102.82  | 9108.07    | 7723.73           | 34491.60 |
| Others     | 177.06  | 92.68      | 181.82  | 4.85     | 621.51   | 1927.62   | 259.61     | 200.85            | 873.86   |
| Total MUFA | 7082.23 | 4479.61    | 7057.74 | 546.92   | 12191.01 | 32144.18  | 9951.81    | 8435.85           | 38064.13 |
| C18:2n-6   | 1947.61 | 895.92     | 2264.43 | 166.15   | 3536.70  | 22351.86  | 4478.32    | 2191.13           | 7898.97  |
| C20:2n-6   | 0.00    | 0.00       | 0.00    | 0.00     | 0.00     | 0.00      | 0.00       | 0.00              | 0.00     |
| C20:3n-6   | 0.00    | 0.00       | 0.00    | 0.00     | 0.00     | 0.00      | 0.00       | 0.00              | 0.00     |
| C20:4n-6   | 160.96  | 51.49      | 214.87  | 70.96    | 0.00     | 0.00      | 86.54      | 91.30             | 1619.20  |
| Total n-6  | 2108.57 | 947.41     | 2479.30 | 237.11   | 3536.70  | 22351.86  | 4564.85    | 2282.43           | 9518.17  |
| C18:3n-3   | 96.58   | 61.79      | 181.82  | 39.81    | 197.31   | 2544.46   | 129.81     | 127.82            | 813.89   |

|            |          |          |         |         |         |          |          |          |          |
|------------|----------|----------|---------|---------|---------|----------|----------|----------|----------|
| C20:3n-3   | 0.00     | 0.00     | 0.00    | 0.00    | 0.00    | 0.00     | 0.00     | 0.00     | 0.00     |
| C20:5n-3   | 0.00     | 0.00     | 52.89   | 0.00    | 76.46   | 0.00     | 0.00     | 0.00     | 0.00     |
| C21:5n-3   | 0.00     | 0.00     | 0.00    | 0.00    | 0.00    | 0.00     | 0.00     | 0.00     | 0.00     |
| C22:5n-3   | 0.00     | 0.00     | 0.00    | 0.00    | 0.00    | 0.00     | 0.00     | 0.00     | 0.00     |
| C22:6n-3   | 0.00     | 0.00     | 0.00    | 1.73    | 0.00    | 0.00     | 0.00     | 0.00     | 0.00     |
| Total n-3  | 96.58    | 61.79    | 234.71  | 41.54   | 273.76  | 2544.46  | 129.81   | 127.82   | 813.89   |
| n-6/n-3    | 21.83    | 15.33    | 10.56   | 5.71    | 12.92   | 8.78     | 35.17    | 17.86    | 11.69    |
| Total PUFA | 2205.15  | 1009.20  | 2661.11 | 450.00  | 3810.46 | 24896.32 | 2747.57  | 2410.24  | 10332.06 |
| Total      | 16240.84 | 10287.66 | 16495.6 | 1568.07 | 24786.5 | 85697.83 | 21677.65 | 17309.92 | 85894.88 |

FA: fatty acids; SFA: saturated fatty acids; MUFA: monounsaturated fatty acids; PUFA: polyunsaturated fatty acids.

**Table S12.** Fatty acids profile (% of total FA) of Fish / Shellfish / Crustaceans sub-category.

| % of total FA |                 |        |                 |        |       |        |       |        |        |       |            |         |        |       |                       |         |         |
|---------------|-----------------|--------|-----------------|--------|-------|--------|-------|--------|--------|-------|------------|---------|--------|-------|-----------------------|---------|---------|
|               | Seabream fillet |        | Sea bass fillet |        | Cod   |        | Sole  | Salmon |        | Tuna  | Farmed Eel | Anchovy | Mussel | Clams | Frozen shelled prawns | Lobster | Octopus |
|               | Caught          | Farmed | Caught          | Farmed | Fresh | Frozen |       | Fresh  | Smoked |       |            |         |        |       |                       |         |         |
| C12:0         | 0.00            | 0.00   | 0.00            | 0.00   | 0.00  | 0.10   | 0.10  | 0.00   | 0.00   | 0.00  | 0.00       | 0.00    | 0.00   | 0.00  | 0.00                  | 0.00    | 0.00    |
| C14:0         | 1.33            | 3.34   | 2.86            | 5.56   | 0.02  | 2.31   | 2.44  | 4.92   | 4.80   | 3.83  | 5.50       | 5.49    | 2.89   | 3.92  | 5.56                  | 0.00    | 3.96    |
| C16:0         | 21.65           | 19.16  | 23.80           | 14.87  | 20.08 | 18.52  | 9.63  | 19.22  | 19.19  | 33.46 | 17.30      | 39.65   | 16.78  | 20.26 | 17.78                 | 20.83   | 27.72   |
| C18:0         | 5.66            | 5.08   | 6.67            | 3.10   | 1.00  | 4.63   | 2.44  | 3.98   | 4.04   | 3.83  | 3.31       | 5.10    | 10.42  | 5.14  | 5.56                  | 7.13    | 9.90    |
| Others        | 0.67            | 0.58   | 0.00            | 0.00   | 3.00  | 0.00   | 0.00  | 0.01   | 0.27   | 0.24  | 0.00       | 0.78    | 0.00   | 3.76  | 1.10                  | 6.58    | 0.00    |
| Total SFA     | 29.31           | 28.16  | 33.33           | 23.53  | 24.10 | 25.56  | 14.61 | 28.13  | 28.30  | 41.36 | 26.11      | 51.02   | 30.09  | 33.08 | 30.00                 | 34.54   | 41.58   |
| C14:1n-6      | 0.00            | 0.00   | 0.00            | 0.00   | 0.00  | 0.00   | 0.00  | 0.00   | 0.00   | 0.00  | 0.69       | 0.00    | 0.00   | 0.00  | 0.00                  | 0.00    | 0.00    |
| C16:1n-7      | 4.33            | 6.68   | 5.71            | 9.31   | 20.08 | 2.31   | 6.49  | 6.16   | 6.06   | 2.72  | 8.69       | 3.92    | 9.26   | 7.78  | 4.44                  | 0.00    | 1.98    |
| C18:1n-9      | 20.65           | 24.97  | 20.00           | 18.30  | 8.03  | 16.89  | 10.55 | 23.30  | 23.23  | 11.73 | 28.68      | 6.67    | 9.26   | 8.62  | 21.11                 | 17.54   | 7.92    |
| Others        | 6.00            | 8.71   | 0.28            | 7.19   | 0.00  | 6.30   | 4.88  | 14.10  | 14.14  | 0.28  | 7.38       | 5.11    | 17.94  | 1.34  | 4.45                  | 10.42   | 9.90    |
| Total MUFA    | 30.98           | 40.36  | 28.57           | 34.80  | 28.11 | 25.50  | 21.92 | 43.56  | 43.43  | 18.64 | 45.44      | 15.70   | 36.46  | 17.74 | 30.00                 | 27.96   | 19.80   |
| C18:2n-6      | 3.66            | 6.10   | 0.95            | 6.05   | 0.00  | 0.00   | 0.01  | 1.42   | 0.51   | 1.85  | 6.31       | 0.39    | 2.89   | 1.29  | 2.22                  | 0.00    | 0.01    |
| C20:2n-6      | 0.00            | 0.00   | 0.00            | 0.00   | 0.00  | 0.00   | 0.00  | 0.00   | 0.00   | 0.00  | 0.00       | 0.00    | 0.00   | 0.00  | 0.00                  | 0.00    | 0.00    |
| C20:3n-6      | 0.00            | 0.00   | 0.00            | 0.00   | 0.00  | 0.00   | 0.00  | 0.00   | 0.00   | 0.00  | 0.00       | 0.00    | 0.00   | 0.00  | 0.00                  | 0.00    | 0.00    |
| C20:4n-6      | 6.33            | 1.02   | 3.81            | 6.05   | 4.02  | 2.31   | 14.61 | 0.47   | 0.51   | 0.01  | 3.19       | 0.01    | 6.37   | 3.37  | 0.51                  | 0.01    | 0.00    |
| Total n-6     | 9.99            | 7.12   | 4.76            | 12.10  | 4.02  | 2.31   | 14.62 | 1.89   | 1.02   | 1.86  | 9.50       | 0.40    | 9.26   | 4.66  | 2.73                  | 0.01    | 0.01    |

|            |       |       |       |       |       |       |       |       |       |       |       |       |       |       |       |       |       |
|------------|-------|-------|-------|-------|-------|-------|-------|-------|-------|-------|-------|-------|-------|-------|-------|-------|-------|
| C18:3n-3   | 0.33  | 0.73  | 0.95  | 0.33  | 0.00  | 0.00  | 5.68  | 0.85  | 0.76  | 1.11  | 0.31  | 0.39  | 2.31  | 1.17  | 1.11  | 0.00  | 0.00  |
| C20:3n-3   | 0.00  | 0.00  | 0.00  | 0.00  | 0.00  | 0.00  | 0.00  | 0.00  | 0.00  | 0.00  | 0.00  | 0.00  | 0.00  | 0.00  | 0.00  | 0.00  | 0.00  |
| C20:5n-3   | 9.66  | 6.78  | 8.57  | 7.84  | 12.05 | 6.94  | 17.86 | 8.43  | 8.33  | 9.88  | 5.00  | 10.60 | 15.63 | 15.67 | 17.27 | 9.88  | 17.82 |
| C21:5n-3   | 0.00  | 0.00  | 0.00  | 0.00  | 0.00  | 0.00  | 0.00  | 0.00  | 0.00  | 0.00  | 0.00  | 0.00  | 0.00  | 0.00  | 0.00  | 0.00  | 0.00  |
| C22:5n-3   | 0.00  | 0.00  | 0.00  | 0.00  | 0.00  | 0.00  | 0.00  | 0.00  | 0.00  | 0.00  | 0.00  | 0.00  | 0.00  | 0.00  | 0.00  | 0.00  | 0.00  |
| C22:6n-3   | 12.66 | 13.79 | 0.10  | 12.65 | 32.13 | 34.72 | 25.97 | 11.27 | 11.36 | 26.54 | 8.69  | 20.41 | 6.37  | 16.86 | 20.00 | 13.71 | 8.69  |
| Total n-3  | 22.65 | 21.30 | 19.05 | 20.82 | 44.18 | 41.66 | 49.51 | 20.55 | 20.45 | 19.05 | 14.00 | 31.40 | 24.31 | 33.70 | 38.38 | 24.12 | 21.78 |
| n-6/n-3    | 0.44  | 0.33  | 0.25  | 0.58  | 0.09  | 0.06  | 0.30  | 0.09  | 0.05  | 0.10  | 0.68  | 0.01  | 0.38  | 0.14  | 0.07  | 0.00  | 0.00  |
| Others     | 7.67  | 3.66  | 23.72 | 8.91  | 0     | 4.64  | 0.01  | 6.44  | 7.57  | 0.12  | 4.6   | 1.56  | 0     | 5.88  | 0     | 14.78 | 13.08 |
| Total PUFA | 40.31 | 32.08 | 38.10 | 41.83 | 48.18 | 48.61 | 64.12 | 28.88 | 29.04 | 39.51 | 28.10 | 33.36 | 33.55 | 44.24 | 41.11 | 38.38 | 39.60 |

FA: fatty acids; SFA: saturated fatty acids; MUFA: monounsaturated fatty acids; PUFA: polyunsaturated fatty acids.

**Table S13.** Fatty acids profile (mg/100g) of Fish / Shellfish / Crustaceans sub-category.

| mg/100g    |                 |         |          |         |       |        |        |         |         |         |            |         |        |        |                       |         |         |
|------------|-----------------|---------|----------|---------|-------|--------|--------|---------|---------|---------|------------|---------|--------|--------|-----------------------|---------|---------|
|            | Seabream fillet |         | Sea bass |         | Cod   |        | Sole   | Salmon  |         | Tuna    | Farmed Eel | Anchovy | Mussel | Clams  | Frozen shelled prawns | Lobster | Octopus |
|            | Caught          | Farmed  | Caught   | Farmed  | Fresh | Frozen |        | Fresh   | Smoked  |         |            |         |        |        |                       |         |         |
| C12:0      | 0.00            | 0.00    | 0.00     | 0.00    | 0.00  | 0.52   | 1.21   | 0.00    | 0.00    | 0.00    | 0.00       | 0.00    | 0.00   | 0.00   | 0.00                  | 0.00    | 0.00    |
| C14:0      | 43.74           | 243.95  | 37.12    | 327.18  | 0.05  | 11.99  | 29.56  | 510.92  | 186.92  | 268.47  | 899.56     | 123.52  | 67.53  | 40.71  | 43.30                 | 0.00    | 34.27   |
| C16:0      | 711.94          | 1399.40 | 308.94   | 875.03  | 52.13 | 96.16  | 116.67 | 1995.90 | 747.29  | 2345.39 | 2829.52    | 892.12  | 392.07 | 210.39 | 138.48                | 342.49  | 239.88  |
| C18:0      | 186.12          | 371.03  | 86.58    | 182.42  | 2.60  | 24.04  | 29.56  | 413.30  | 157.33  | 268.47  | 541.37     | 114.75  | 243.46 | 53.38  | 43.30                 | 117.23  | 85.67   |
| Others     | 22.03           | 42.36   | 0.00     | 0.00    | 7.79  | 0.00   | 0.00   | 1.04    | 10.51   | 16.82   | 0.00       | 17.55   | 0.00   | 39.05  | 8.57                  | 108.19  | 0.00    |
| Total SFA  | 963.84          | 2056.74 | 432.64   | 1384.63 | 62.57 | 132.71 | 177.00 | 2921.16 | 1102.06 | 2899.14 | 4270.44    | 1147.94 | 703.06 | 343.52 | 233.65                | 567.91  | 359.82  |
| C14:1n-6   | 0.00            | 0.00    | 0.00     | 0.00    | 0.00  | 0.00   | 0.00   | 0.00    | 0.00    | 0.00    | 112.85     | 0.00    | 0.00   | 0.00   | 0.00                  | 0.00    | 0.00    |
| C16:1n-7   | 142.39          | 487.89  | 74.12    | 547.85  | 52.13 | 11.99  | 78.63  | 639.69  | 235.99  | 190.66  | 1421.30    | 88.20   | 216.36 | 80.79  | 34.58                 | 0.00    | 17.13   |
| C18:1n-9   | 679.06          | 1823.75 | 259.61   | 1076.87 | 20.85 | 87.70  | 127.82 | 2419.59 | 904.62  | 822.22  | 4690.78    | 150.07  | 216.36 | 89.51  | 164.41                | 288.39  | 68.54   |
| Others     | 197.31          | 636.16  | 3.63     | 423.10  | 0.00  | 32.71  | 59.12  | 1464.21 | 550.64  | 19.63   | 1207.04    | 114.97  | 419.17 | 13.92  | 34.66                 | 171.33  | 85.67   |
| Total MUFA | 1018.75         | 2947.80 | 370.86   | 2047.82 | 72.98 | 132.40 | 265.57 | 4523.49 | 1691.25 | 1306.58 | 7431.98    | 353.25  | 851.89 | 184.22 | 233.65                | 459.72  | 171.34  |
| C18:2n-6   | 120.36          | 445.53  | 12.33    | 356.02  | 0.00  | 0.00   | 0.12   | 147.46  | 19.86   | 129.68  | 1032.04    | 8.77    | 67.53  | 13.40  | 17.29                 | 0.00    | 0.09    |
| C20:2n-6   | 0.00            | 0.00    | 0.00     | 0.00    | 0.00  | 0.00   | 0.00   | 0.00    | 0.00    | 0.00    | 0.00       | 0.00    | 0.00   | 0.00   | 0.00                  | 0.00    | 0.00    |
| C20:3n-6   | 0.00            | 0.00    | 0.00     | 0.00    | 0.00  | 0.00   | 0.00   | 0.00    | 0.00    | 0.00    | 0.00       | 0.00    | 0.00   | 0.00   | 0.00                  | 0.00    | 0.00    |
| C20:4n-6   | 208.16          | 74.50   | 49.46    | 356.02  | 10.44 | 11.99  | 177.00 | 48.81   | 19.86   | 0.70    | 521.74     | 0.22    | 148.84 | 35.00  | 3.97                  | 0.16    | 0.00    |



|            |         |         |         |         |        |        |        |          |         |         |          |         |         |        |        |         |        |
|------------|---------|---------|---------|---------|--------|--------|--------|----------|---------|---------|----------|---------|---------|--------|--------|---------|--------|
| Total n-6  | 328.51  | 520.03  | 61.79   | 712.03  | 10.44  | 11.99  | 177.12 | 196.27   | 39.72   | 130.38  | 1553.78  | 9.00    | 216.36  | 48.39  | 21.26  | 0.16    | 0.09   |
| C18:3n-3   | 10.85   | 53.32   | 12.33   | 19.42   | 0.00   | 0.00   | 68.81  | 88.27    | 29.60   | 77.81   | 50.70    | 8.77    | 53.97   | 12.15  | 8.65   | 0.00    | 0.00   |
| C20:3n-3   | 0.00    | 0.00    | 0.00    | 0.00    | 0.00   | 0.00   | 0.00   | 0.00     | 0.00    | 0.00    | 0.00     | 0.00    | 0.00    | 0.00   | 0.00   | 0.00    | 0.00   |
| C20:5n-3   | 317.66  | 495.20  | 111.24  | 461.35  | 31.28  | 36.03  | 216.38 | 875.41   | 324.39  | 692.54  | 817.78   | 238.50  | 365.20  | 162.73 | 138.48 | 162.45  | 154.21 |
| C21:5n-3   | 0.00    | 0.00    | 0.00    | 0.00    | 0.00   | 0.00   | 0.00   | 0.00     | 0.00    | 0.00    | 0.00     | 0.00    | 0.00    | 0.00   | 0.00   | 0.00    | 0.00   |
| C22:5n-3   | 0.00    | 0.00    | 0.00    | 0.00    | 0.00   | 0.00   | 0.00   | 0.00     | 0.00    | 0.00    | 0.00     | 0.00    | 0.00    | 0.00   | 0.00   | 0.00    | 0.00   |
| C22:6n-3   | 416.31  | 1007.19 | 1.30    | 744.40  | 83.41  | 180.27 | 314.63 | 1170.33  | 442.38  | 1860.33 | 1421.30  | 459.22  | 148.84  | 175.08 | 155.77 | 225.42  | 75.20  |
| Total n-3  | 744.83  | 1555.70 | 247.28  | 1225.16 | 114.70 | 216.31 | 599.83 | 2134.01  | 796.36  | 1335.32 | 2289.78  | 706.49  | 568.01  | 349.96 | 302.89 | 396.58  | 188.48 |
| n-6/n-3    | 0.44    | 0.33    | 0.25    | 0.58    | 0.09   | 0.06   | 0.30   | 0.09     | 0.05    | 0.10    | 0.68     | 0.01    | 0.38    | 0.14   | 0.07   | 0.00    | 0.00   |
| Total PUFA | 1325.56 | 2343.05 | 494.56  | 2461.51 | 125.11 | 252.40 | 776.83 | 2999.04  | 1130.87 | 2769.47 | 4595.92  | 750.59  | 784.13  | 459.41 | 320.18 | 631.05  | 342.69 |
| Total      | 3308.15 | 7347.59 | 1298.06 | 5893.96 | 260.66 | 517.51 | 1219.4 | 10443.69 | 3924.18 | 6975.19 | 16298.34 | 2251.78 | 2339.08 | 987.15 | 787.48 | 1658.68 | 873.85 |

FA: fatty acids; SFA: saturated fatty acids; MUFA: monounsaturated fatty acids; PUFA: polyunsaturated fatty acids.

**Table S14.** Fatty acids profile (% of total FA) of Cheeses sub-category

| % of total FA |             |                |             |               |                    |                        |            |                   |        |
|---------------|-------------|----------------|-------------|---------------|--------------------|------------------------|------------|-------------------|--------|
|               | Aged cheese | Mixed caciotta | Cow ricotta | Sheep ricotta | Creamy blue cheese | Yogurt from whole milk | Whole milk | Semi-skimmed milk | Butter |
| C12:0         | 3.70        | 3.99           | 3.89        | 6.24          | 2.69               | 3.94                   | 3.29       | 3.51              | 3.18   |
| C14:0         | 12.10       | 11.91          | 13.26       | 13.80         | 9.25               | 11.83                  | 11.09      | 11.93             | 11.07  |
| C16:0         | 28.61       | 28.75          | 34.80       | 26.94         | 30.25              | 30.24                  | 27.48      | 31.58             | 27.79  |
| C18:0         | 10.93       | 10.38          | 10.57       | 7.37          | 13.35              | 11.18                  | 11.65      | 14.74             | 12.52  |
| Others        | 10.64       | 10.89          | 5.49        | 15.22         | 8.69               | 10.86                  | 9.51       | 0.70              | 10.43  |
| Total SFA     | 65.98       | 65.92          | 68.01       | 69.57         | 64.23              | 68.05                  | 63.02      | 62.46             | 64.99  |
| C14:1n-6      | 0.00        | 0.00           | 1.10        | 0.38          | 0.00               | 0.00                   | 2.09       | 0.00              | 1.52   |
| C16:1n-7      | 2.28        | 0.00           | 1.89        | 1.51          | 3.37               | 0.33                   | 2.99       | 2.81              | 2.53   |
| C18:1n-9      | 29.04       | 26.90          | 26.63       | 20.70         | 28.77              | 27.28                  | 27.78      | 30.18             | 27.55  |
| Others        | 0.03        | 0.14           | -2.10       | 1.04          | 0.10               | 0.00                   | 0.00       | -0.01             | 0.00   |
| Total MUFA    | 31.35       | 27.04          | 27.52       | 23.63         | 32.24              | 27.61                  | 32.86      | 32.98             | 31.60  |
| C18:2n-6      | 1.35        | 4.40           | 2.49        | 3.02          | 2.05               | 2.63                   | 2.09       | 3.51              | 2.09   |
| C20:2n-6      | 0.00        | 0.00           | 0.00        | 0.00          | 0.00               | 0.00                   | 0.00       | 0.00              | 0.00   |
| C20:3n-6      | 0.00        | 0.00           | 0.00        | 0.00          | 0.00               | 0.00                   | 0.00       | 0.00              | 0.00   |
| C20:4n-6      | 0.00        | 0.00           |             | 0.00          | 0.00               | 0.00                   | 0.00       | 0.00              | 0.00   |
| Total n-6     | 1.35        | 4.40           | 2.49        | 3.02          | 2.05               | 2.63                   | 2.09       | 3.51              | 2.18   |
| C18:3n-3      | 1.49        | 2.87           | 1.40        | 3.31          | 1.28               | 1.64                   | 1.49       | 2.11              | 1.57   |

|            |      |      |      |      |      |      |      |      |      |
|------------|------|------|------|------|------|------|------|------|------|
| C20:3n-3   | 0.00 | 0.00 | 0.00 | 0.00 | 0.00 | 0.00 | 0.00 | 0.00 | 0.00 |
| C20:5n-3   | 0.00 | 0.00 | 0.00 | 0.00 | 0.00 | 0.00 | 0.00 | 0.00 | 0.00 |
| C21:5n-3   | 0.00 | 0.00 | 0.00 | 0.00 | 0.00 | 0.00 | 0.00 | 0.00 | 0.00 |
| C22:5n-3   | 0.00 | 0.00 | 0.00 | 0.00 | 0.00 | 0.00 | 0.00 | 0.00 | 0.00 |
| C22:6n-3   | 0.00 | 0.00 | 0.00 | 0.00 | 0.00 | 0.00 | 0.00 | 0.00 | 0.00 |
| Total n-3  | 1.49 | 2.87 | 1.40 | 3.31 | 1.28 | 1.64 | 1.49 | 2.11 | 1.57 |
| n-6/n-3    | 0.23 | 1.53 | 1.78 | 0.91 | 1.60 | 1.60 | 1.40 | 1.66 | 1.39 |
| Total PUFA | 2.81 | 7.27 | 3.89 | 6.43 | 3.33 | 2.81 | 3.58 | 5.61 | 3.66 |

FA: fatty acids; SFA: saturated fatty acids; MUFA: monounsaturated fatty acids; PUFA: polyunsaturated fatty acids.

**Table S15.** Fatty acids profile (mg/100g) of Cheeses sub-category

| mg/100g    |               |                |             |               |                    |                        |            |                   |          |
|------------|---------------|----------------|-------------|---------------|--------------------|------------------------|------------|-------------------|----------|
|            | Aged cheese 1 | Mixed caciotta | Cow ricotta | Sheep ricotta | Creamy blue cheese | Yogurt from whole milk | Whole milk | Semi-skimmed milk | Butter   |
| C12:0      | 950.96        | 1070.38        | 366.93      | 620.99        | 630.85             | 132.97                 | 102.50     | 45.56             | 2295.08  |
| C14:0      | 3109.90       | 3195.05        | 1250.76     | 1373.35       | 2169.28            | 399.26                 | 345.49     | 154.86            | 7989.47  |
| C16:0      | 7353.24       | 7712.65        | 3282.54     | 2681.02       | 7094.13            | 1020.59                | 856.10     | 409.93            | 20056.68 |
| C18:0      | 2809.19       | 2784.60        | 997.02      | 733.45        | 3130.80            | 377.32                 | 362.94     | 191.33            | 9035.97  |
| Others     | 2734.65       | 2921.42        | 517.85      | 1514.67       | 2037.95            | 366.52                 | 296.27     | 9.09              | 7527.57  |
| Total SFA  | 16957.94      | 17684.11       | 6415.10     | 6923.48       | 15063.00           | 2296.66                | 1963.29    | 810.77            | 46904.76 |
| C14:1n-6   | 0.00          | 0.00           | 103.76      | 37.82         | 0.00               | 0.00                   | 65.11      | 0.00              | 1097.02  |
| C16:1n-7   | 586.00        | 0.00           | 178.28      | 150.27        | 790.32             | 11.14                  | 93.15      | 36.48             | 1825.96  |
| C18:1n-9   | 7463.76       | 7216.36        | 2511.90     | 2060.03       | 6747.04            | 920.69                 | 865.44     | 391.76            | 19883.46 |
| Others     | 7.71          | 37.56          | -198.08     | 103.50        | 23.45              | 0.00                   | 0.00       | -0.13             | 0.00     |
| Total MUFA | 8057.46       | 7253.92        | 2595.85     | 2351.61       | 7560.82            | 931.83                 | 1023.70    | 428.10            | 22806.44 |
| C18:2n-6   | 89.96         | 1180.37        | 234.87      | 300.54        | 480.76             | 88.76                  | 65.11      | 45.56             | 1508.40  |
| C20:2n-6   | 0.00          | 0.00           | 0.00        | 0.00          | 0.00               | 0.00                   | 0.00       | 0.00              | 0.00     |
| C20:3n-6   | 0.00          | 0.00           | 0.00        | 0.00          | 0.00               | 0.00                   | 0.00       | 0.00              | 0.00     |
| C20:4n-6   | 0.00          | 0.00           | 0.00        | 0.00          | 0.00               | 0.00                   | 0.00       | 0.00              | 0.00     |
| Total n-6  | 89.96         | 1180.37        | 234.87      | 300.54        | 480.76             | 88.76                  | 65.11      | 45.56             | 1573.36  |

|            |          |          |         |         |          |         |         |         |          |
|------------|----------|----------|---------|---------|----------|---------|---------|---------|----------|
| C18:3n-3   | 382.95   | 769.92   | 132.06  | 329.40  | 300.18   | 55.35   | 46.42   | 27.39   | 1133.10  |
| C20:3n-3   | 0.00     | 0.00     | 0.00    | 0.00    | 0.00     | 0.00    | 0.00    | 0.00    | 0.00     |
| C20:5n-3   | 0.00     | 0.00     | 0.00    | 0.00    | 0.00     | 0.00    | 0.00    | 0.00    | 0.00     |
| C21:5n-3   | 0.00     | 0.00     | 0.00    | 0.00    | 0.00     | 0.00    | 0.00    | 0.00    | 0.00     |
| C22:5n-3   | 0.00     | 0.00     | 0.00    | 0.00    | 0.00     | 0.00    | 0.00    | 0.00    | 0.00     |
| C22:6n-3   | 0.00     | 0.00     | 0.00    | 0.00    | 0.00     | 0.00    | 0.00    | 0.00    | 0.00     |
| Total n-3  | 382.95   | 769.92   | 132.06  | 329.40  | 300.18   | 55.35   | 46.42   | 27.39   | 1133.10  |
| n-6/n-3    | 0.23     | 1.53     | 1.78    | 0.91    | 1.60     | 1.60    | 43.70   | 21.59   | 1.39     |
| Total PUFA | 722.22   | 1950.30  | 366.93  | 639.90  | 780.94   | 94.84   | 111.53  | 72.82   | 2641.51  |
| Total      | 25737.62 | 26888.33 | 9377.88 | 9914.99 | 23404.76 | 3323.33 | 3098.52 | 1311.69 | 72352.71 |

FA: fatty acids; SFA: saturated fatty acids; MUFA: monounsaturated fatty acids; PUFA: polyunsaturated fatty acids.

**Table S16.** Fatty acids profile (% of total FA) of Eggs sub-category.

| % of total FA |             |                   |               |          |
|---------------|-------------|-------------------|---------------|----------|
|               | Laying hen  |                   |               |          |
|               | Chicken egg | Yolk conventional | Yolk Bio-plus | Duck egg |
| C12:0         | 0.00        | 0.00              | 0.61          | 0.00     |
| C14:0         | 0.43        | 0.18              | 1.92          | 0.38     |
| C16:0         | 27.30       | 25.49             | 26.82         | 22.92    |
| C18:0         | 17.39       | 33.13             | 30.26         | 4.81     |
| Others        | 0.43        | 3.10              | 4.12          | 0.00     |
| Total SFA     | 45.55       | 61.90             | 63.73         | 28.11    |
| C14:1n-6      | 0.00        | 0.00              | 0.20          | 0.00     |
| C16:1n-7      | 3.30        | 0.31              | 0.50          | 3.36     |
| C18:1n-9      | 33.76       | 32.44             | 32.47         | 46.45    |
| Others        | 0.01        | 0.56              | 0.00          | 0.00     |
| Total MUFA    | 37.07       | 33.31             | 33.50         | 49.81    |
| C18:2n-6      | 15.23       | 3.10              | 3.24          | 19.56    |
| C20:2n-6      | 0.00        | 0.00              | 0.00          | 0.00     |
| C20:3n-6      | 0.00        | 0.00              | 0.00          | 0.00     |
| C20:4n-6      | 2.30        | 0.96              | 0.00          | 2.44     |
| Total n-6     | 17.53       | 4.06              | 3.24          | 22.00    |
| C18:3n-3      | 0.57        | 0.18              | 0.29          | 0.76     |
| C20:3n-3      | 0.00        | 0.00              | 0.00          | 0.00     |
| C20:5n-3      | 0.00        | 0.00              | 0.00          | 0.00     |
| C21:5n-3      | 0.00        | 0.00              | 0.00          | 0.00     |
| C22:5n-3      | 0.00        | 0.00              | 0.00          | 0.00     |
| C22:6n-3      | 0.00        | 0.00              | 0.00          | 0.00     |
| Total n-3     | 0.57        | 0.18              | 0.29          | 0.76     |
| n-6/n-3       | 30.75       | 22.56             | 11.17         | 28.95    |
| Total PUFA    | 18.01       | 4.24              | 3.73          | 22.77    |

FA: fatty acids; SFA: saturated fatty acids; MUFA: monounsaturated fatty acids; PUFA: polyunsaturated fatty acids.

**Table S17.** Fatty acids profile (mg/100g) of Eggs sub-category

| mg/100g    |             |                   |               |          |
|------------|-------------|-------------------|---------------|----------|
|            | Laying hen  |                   |               |          |
|            | Chicken egg | Yolk conventional | Yolk Bio-plus | Duck egg |
| C12:0      | 0.00        | 0.00              | 0.00          | 0.00     |
| C14:0      | 32.37       | 0.00              | 95.00         | 50.64    |
| C16:0      | 2055.35     | 5300.00           | 4700.00       | 3054.50  |
| C18:0      | 1309.25     | 2610.00           | 1820.00       | 641.02   |
| Others     | 32.37       | 901.37            | 195.00        | 0.00     |
| Total SFA  | 3429.35     | 8210.00           | 6810.00       | 3746.16  |
| C14:1n-6   | 0.00        | 0.00              | 0.00          | 0.00     |
| C16:1n-7   | 248.45      | 0.00              | 725.00        | 447.78   |
| C18:1n-9   | 2541.71     | 10060.00          | 11440.00      | 6190.29  |
| Others     | 0.75        | 162.83            | 0.00          | 0.00     |
| Total MUFA | 2790.91     | 11200.00          | 12165.00      | 6638.07  |
| C18:2n-6   | 1146.63     | 2600.00           | 1880.00       | 2606.72  |
| C20:2n-6   | 0.00        | 0.00              | 0.00          | 0.00     |
| C20:3n-6   | 0.00        | 0.00              | 0.00          | 0.00     |
| C20:4n-6   | 173.16      | 5880.00           | 110.00        | 325.17   |
| Total n-6  | 1319.79     | 8480.00           | 1990.00       | 2931.89  |
| C18:3n-3   | 42.91       | 130.00            | 334.00        | 101.28   |
| C20:3n-3   | 0.00        | 0.00              | 31.00         | 0.00     |
| C20:5n-3   | 0.00        | 29.00             | 15.00         | 0.00     |
| C21:5n-3   | 0.00        | 0.00              | 0.00          | 0.00     |
| C22:5n-3   | 0.00        | 15.00             | 15.00         | 0.00     |
| C22:6n-3   | 0.00        | 87.00             | 501.00        | 0.00     |
| Total n-3  | 42.91       | 261.00            | 896.00        | 101.28   |
| n-6/n-3    | 30.75       | 32.49             | 2.22          | 28.95    |
| Total PUFA | 1355.93     | 2600.00           | 3330.00       | 3034.51  |
| Total      | 7576.19     | 22010             | 22305         | 13418.74 |

FA: fatty acids; SFA: saturated fatty acids; MUFA: monounsaturated fatty acids; PUFA: polyunsaturated fatty acids.
